# Supplementary material for: A Mechanochemical Route for ZnS Nanocrystals, and Batch Sorting along Size Distribution
Source: MDPI journal article supplement (doi:10.3390/nano9091325), 2019-09-15
Supplement: s1 [file s1]

*Article*

# **A Mechanochemical Route for ZnS Nanocrystals, and Batch Sorting Along Size Distribution**

**Pengfei Hu, Chen Xie, Zhihui Mao and Xue Liang \***

Laboratory for Microstructures, Shanghai University, Shanghai 200444, P. R. China;

[hpf-hqx@shu.edu.cn](mailto:hpf-hqx@shu.edu.cn) (P.F.H.); [FHYKong@shu.edu.cn](mailto:FHYKong@shu.edu.cn) (C.X.); [maozhihui@shu.edu.cn](mailto:maozhihui@shu.edu.cn) (Z.H.M.)

\* Correspondence: [liangxue@shu.edu.cn](mailto:liangxue@shu.edu.cn) (X.L.); Tel.: +86-21-66135030 (X.L.)

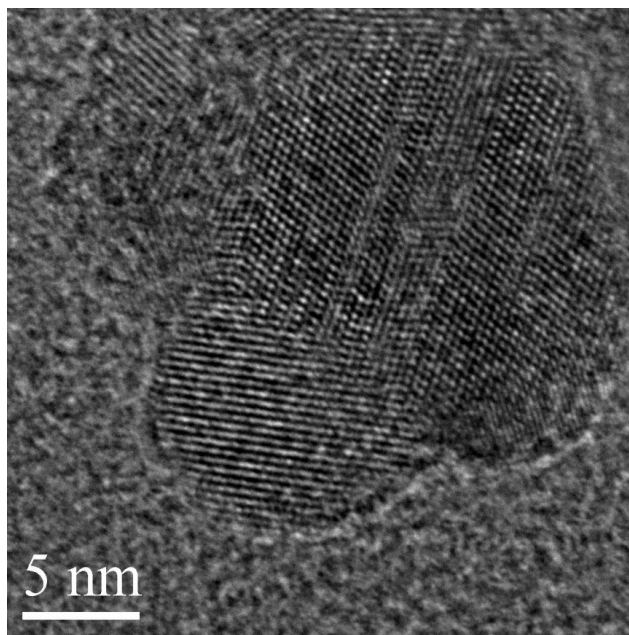

**Figure S1.** HRTEM images of Q-ZnS-c nanocrystals, showing twinning structures and agglomeration behavior.

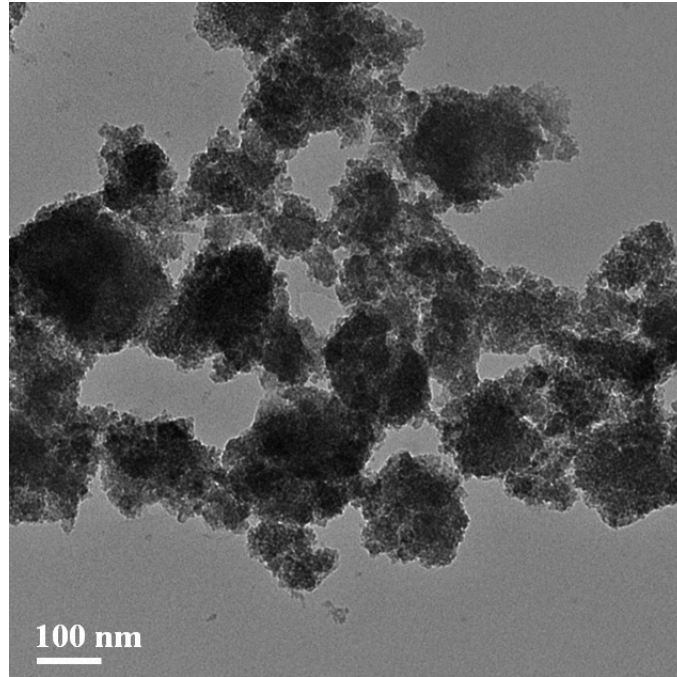

**Figure S2.** TEM images of ZnS samples synthesized through mechanochemical route without SDBS, indicating the large aggregates of nanoparticles.
